# Supplementary material for: Formation of Mn3O4nanoparticles from the cluster [Mn12O12(C2H5COO)16(H2O)3] anchored to hybrid mesoporous silica
Source: Royal Society of Chemistry journal article supplement (doi:10.1039/b404967e), 2004-01-01
Supplement: b404967e_f1-5.doc [file b404967e_f1-5.doc]

Revised May 2004

# SUPPLEMENTARY MATERIAL

**Formation of Mn3O4 Nanoparticles from the Cluster [Mn12O12(C2H5COO)16(H2O)3] Anchored to Hybrid Mesoporous Silica.**

**Benjamin Folch, Joulia Larionova,* Yannick Guari,* Christian Guérin, Ahmad Mehdi,and Catherine Reyé**

Laboratoire de Chimie Moléculaire et Organisation du Solide (LCMOS), UMR 5637, Université Montpellier II, Place E. Bataillon, 34095 Montpellier cedex 5, France. Fax: (33) 4 67 14 38 52, e-mail: [joulia@univ-montp2.fr](mailto:joulia@univ-montp2.fr); [guari@univ-montp2.fr](mailto:guari@univ-montp2.fr).

**Figure 1S**. Evolution of the amount of inserted cluster [Mn12O12(C2H5COO)16(H2O)3] (in wt %) with initial cluster concentration in **1a** (****)and  **1b** ().

**Figure 2S.** Infrared spectra ofa) the mesoporous silica HOOC(CH2)3SiO1.5/4SiO2 **1a**; b) the nanocomposite **2a**; c) the individual cluster [Mn12O12(C2H5COO)16(H2O)3] d) subtracted spectrum of **2a** and **1a**.

**Figure 3S.** Temperature dependences of ’ (in-phase) and ” (out-of-phase) ac susceptibility with different frequencies performed for **2a** ((--) 1000 Hz; (-∆-) 799 Hz; (--) 299 Hz, (-▲) 125 Hz, (-■-) 50 Hz, (--) 10 Hz, (-o -) 1 Hz.

**Figure 4S.** Powder X-ray diffraction patterns within the range of 2** (0 – 10°) for **1b** (--) and **2b (**--). Insert: Magnification of the powder X-ray diffraction patterns showing the (110) and (200) reflections.

**Figure 5S**. a) HR TEM image of **2a**; b) EDS analysis coupled with HR TEM for **2a**.

**Figure 1S**. Evolution of the amount of inserted cluster [Mn12O12(C2H5COO)16(H2O)3] (in wt %) with initial cluster concentration in **1a** (****)and  **1b** ().

a)

a)

b)

c)

d)

**Figure 2S.** Infrared spectra ofa) the mesoporous silica HOOC(CH2)3SiO1.5/4SiO2 **1a**; b) the nanocomposite **2a**; c) the individual cluster [Mn12O12(C2H5COO)16(H2O)3] d) subtracted spectrum of **2a** and **1a**.

**Figure 3S.** Temperature dependences of ’ (in-phase) (top) and ” (out-of-phase) (bottom) ac susceptibility with different frequencies performed for **2a** ((-■-) 1000 Hz; (-∆-) 799 Hz; (--) 299 Hz, (-▲) 125 Hz, (--) 50 Hz, (--) 10 Hz, (-o -) 1 Hz.

**Figure 4S.** Powder X-ray diffraction patterns within the range of 2** (0 – 10°) for **1b** (--) and **2b (**--). Insert: Magnification of the powder X-ray diffraction patterns showing the (110) and (200) reflections.


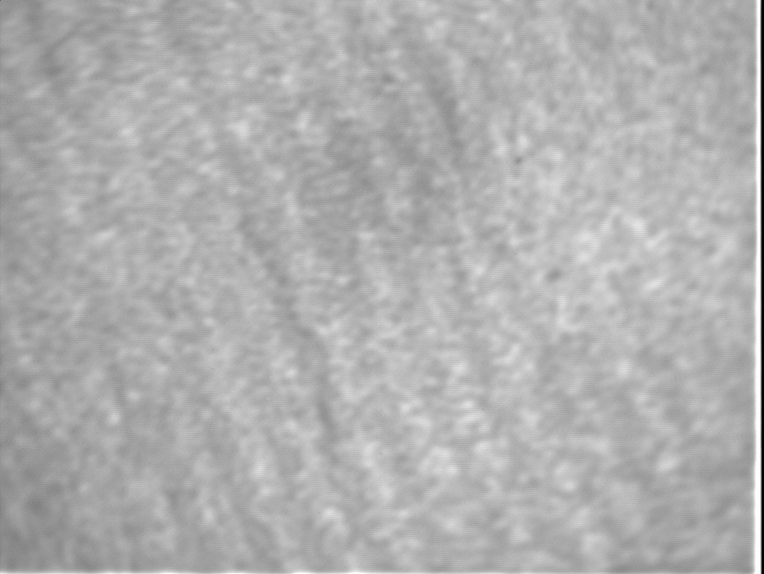


**a)**


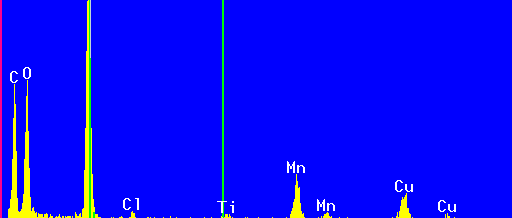


**b)**

**Figure 5S**. a) HR TEM image of **2a**; b) EDS analysis coupled with HR TEM for **2a**.
