# Supplementary material for: Formation of Mn3O4nanoparticles from the cluster [Mn12O12(C2H5COO)16(H2O)3] anchored to hybrid mesoporous silica
Source: Royal Society of Chemistry journal article supplement (doi:10.1039/b404967e), 2004-01-01
Supplement: b404967e_f6-10.doc [file b404967e_f6-10.doc]

Revised May 2004

# SUPPLEMENTARY MATERIAL

**Formation of Mn3O4 Nanoparticles from the Cluster [Mn12O12(C2H5COO)16(H2O)3] Anchored to Hybrid Mesoporous Silica.**

**Benjamin Folch, Joulia Larionova,* Yannick Guari,* Christian Guérin, Ahmad Mehdi,and Catherine Reyé**

Laboratoire de Chimie Moléculaire et Organisation du Solide (LCMOS), UMR 5637, Université Montpellier II, Place E. Bataillon, 34095 Montpellier cedex 5, France. Fax: (33) 4 67 14 38 52, e-mail: [joulia@univ-montp2.fr](mailto:joulia@univ-montp2.fr); [guari@univ-montp2.fr](mailto:guari@univ-montp2.fr).

**Figure 6S.** Infrared spectra of [Mn12O12(C2H5COO)16(H2O)3]a) calcinated at 350 °C showing the formation of Mn3O4 manganese oxide; b) Infrared spectra of [Mn12O12(C2H5COO)16(H2O)3]calcinated at 700 °C showing the formation of Mn2O3 manganese oxide.

**Figure 7S.** Raman spectra of [Mn12O12(C2H5COO)16(H2O)3]calcinated at 350 °C showing the formation of Mn3O4.

**Figure 8S.** TEM micrographs of a) [Mn12O12(C2H5COO)16(H2O)3]calcinated at 350 °C and b) [Mn12O12(C2H5COO)16(H2O)3]calcinated at 700 °C.

**Figure 9S.** Raman spectrum of **3a**.

**Figure 10S.** Hysteresis curvesperformed at 4 (●) and 40 K (○) for the sample **3a**.

a)

b)

**Figure 6S.** Infrared spectra of [Mn12O12(C2H5COO)16(H2O)3]a) calcinated at 350 °C showing the formation of Mn3O4 manganese oxide; b) Infrared spectra of [Mn12O12(C2H5COO)16(H2O)3]calcinated at 700 °C showing the formation of Mn2O3 manganese oxide.

**Figure 7S.** Raman spectra of [Mn12O12(C2H5COO)16(H2O)3]calcinated at 350 °C showing the formation of Mn3O4.


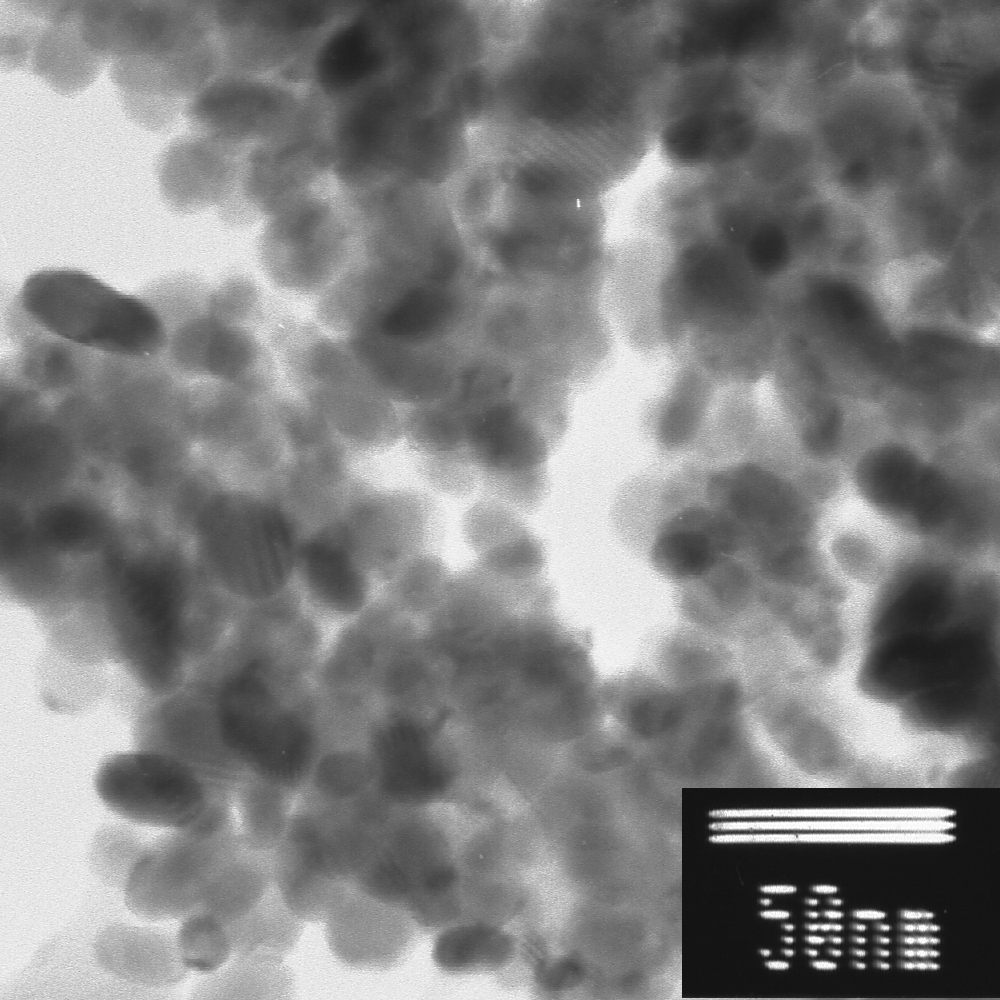

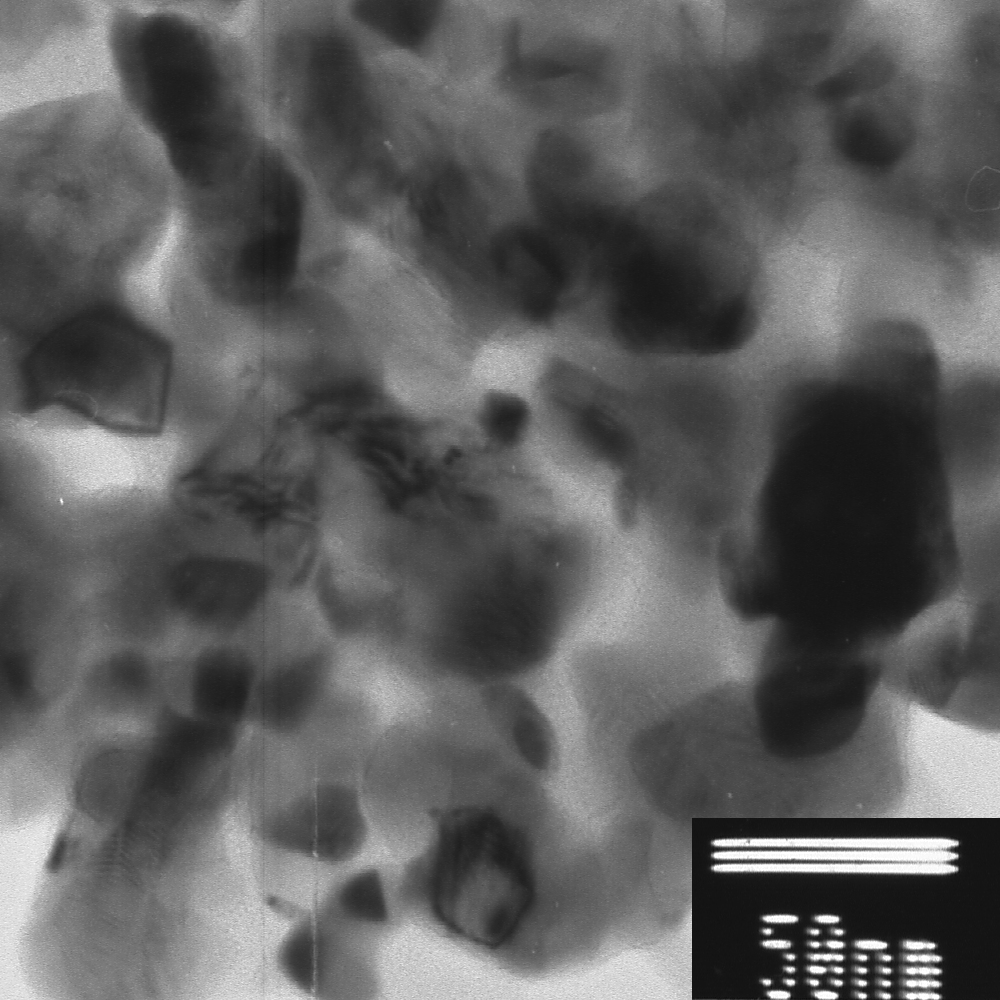


**Figure 8S.** TEM micrographs of a) [Mn12O12(C2H5COO)16(H2O)3]calcinated at 350 °C and b) [Mn12O12(C2H5COO)16(H2O)3]calcinated at 700 °C.

**Figure 9S**. Raman spectrum of **3a**.

**Figure 10S.** Hysteresis curvesperformed at 4 (●) and 40 K (○) for the sample **3a**.
