# Supplementary material for: Formation of Mn3O4nanoparticles from the cluster [Mn12O12(C2H5COO)16(H2O)3] anchored to hybrid mesoporous silica
Source: Royal Society of Chemistry journal article supplement (doi:10.1039/b404967e), 2004-01-01
Supplement: b404967e_f11-15.doc [file b404967e_f11-15.doc]

Revised May 2004

# SUPPLEMENTARY MATERIAL

**Formation of Mn3O4 Nanoparticles from the Cluster [Mn12O12(C2H5COO)16(H2O)3] Anchored to Hybrid Mesoporous Silica.**

**Benjamin Folch, Joulia Larionova,* Yannick Guari,* Christian Guérin, Ahmad Mehdi,and Catherine Reyé**

Laboratoire de Chimie Moléculaire et Organisation du Solide (LCMOS), UMR 5637, Université Montpellier II, Place E. Bataillon, 34095 Montpellier cedex 5, France. Fax: (33) 4 67 14 38 52, e-mail: [joulia@univ-montp2.fr](mailto:joulia@univ-montp2.fr); [guari@univ-montp2.fr](mailto:guari@univ-montp2.fr).

**Figure 11S.** Powder X-ray diffraction patterns within the range of 2** (0 – 10°) for **1b (-▲-)** and **3b** (-**○**-). Insert: magnification of the powder X-ray diffraction patterns showing the (110) and (200) reflections for **1b (–**-) and **3b (-○-)**.

**Figure 12S.** Powder X-ray diffraction patterns within the range of 2** (0 – 10°) for the silica **1b (–**-) and the silica **1b** calcinated at 700 °C.

**Figure 13S.** TEM micrograph of sample **3a** showing exclusive formation of Mn3O4 nanoparticles within the pore channels.

**Figure 14S.** Powder X-ray diffraction pattern within the range of 2** (10 – 70°) for the cluster [Mn12O12(CH3COO)16(H2O)4] inserted into the nonfunctionalized silica and calcinated at 700 °C showing the formation of manganese oxides Mn2O3 and Mn3O4.

**Figure 15S.** TEM micrograph of the sample obtained by thermal treatment (at 700 °C) of the cluster [Mn12O12(CH3COO)16(H2O)4] inserted into the nonfunctionalized silica showing the extrusion of the manganese oxide out of the silica pores.

**Figure 11S.** Powder X-ray diffraction patterns within the range of 2** (0 – 10°) for **1b (-▲-)** and **3b** (-**○**-). Insert: magnification of the powder X-ray diffraction patterns showing the (110) and (200) reflections for **1b (–**-) and **3b (-○-)**.

**Figure 12S.** Powder X-ray diffraction patterns within the range of 2** (0 – 10°) for the pristine silica **1b (–**-) and the silica **1b** calcinated at 700 °C.


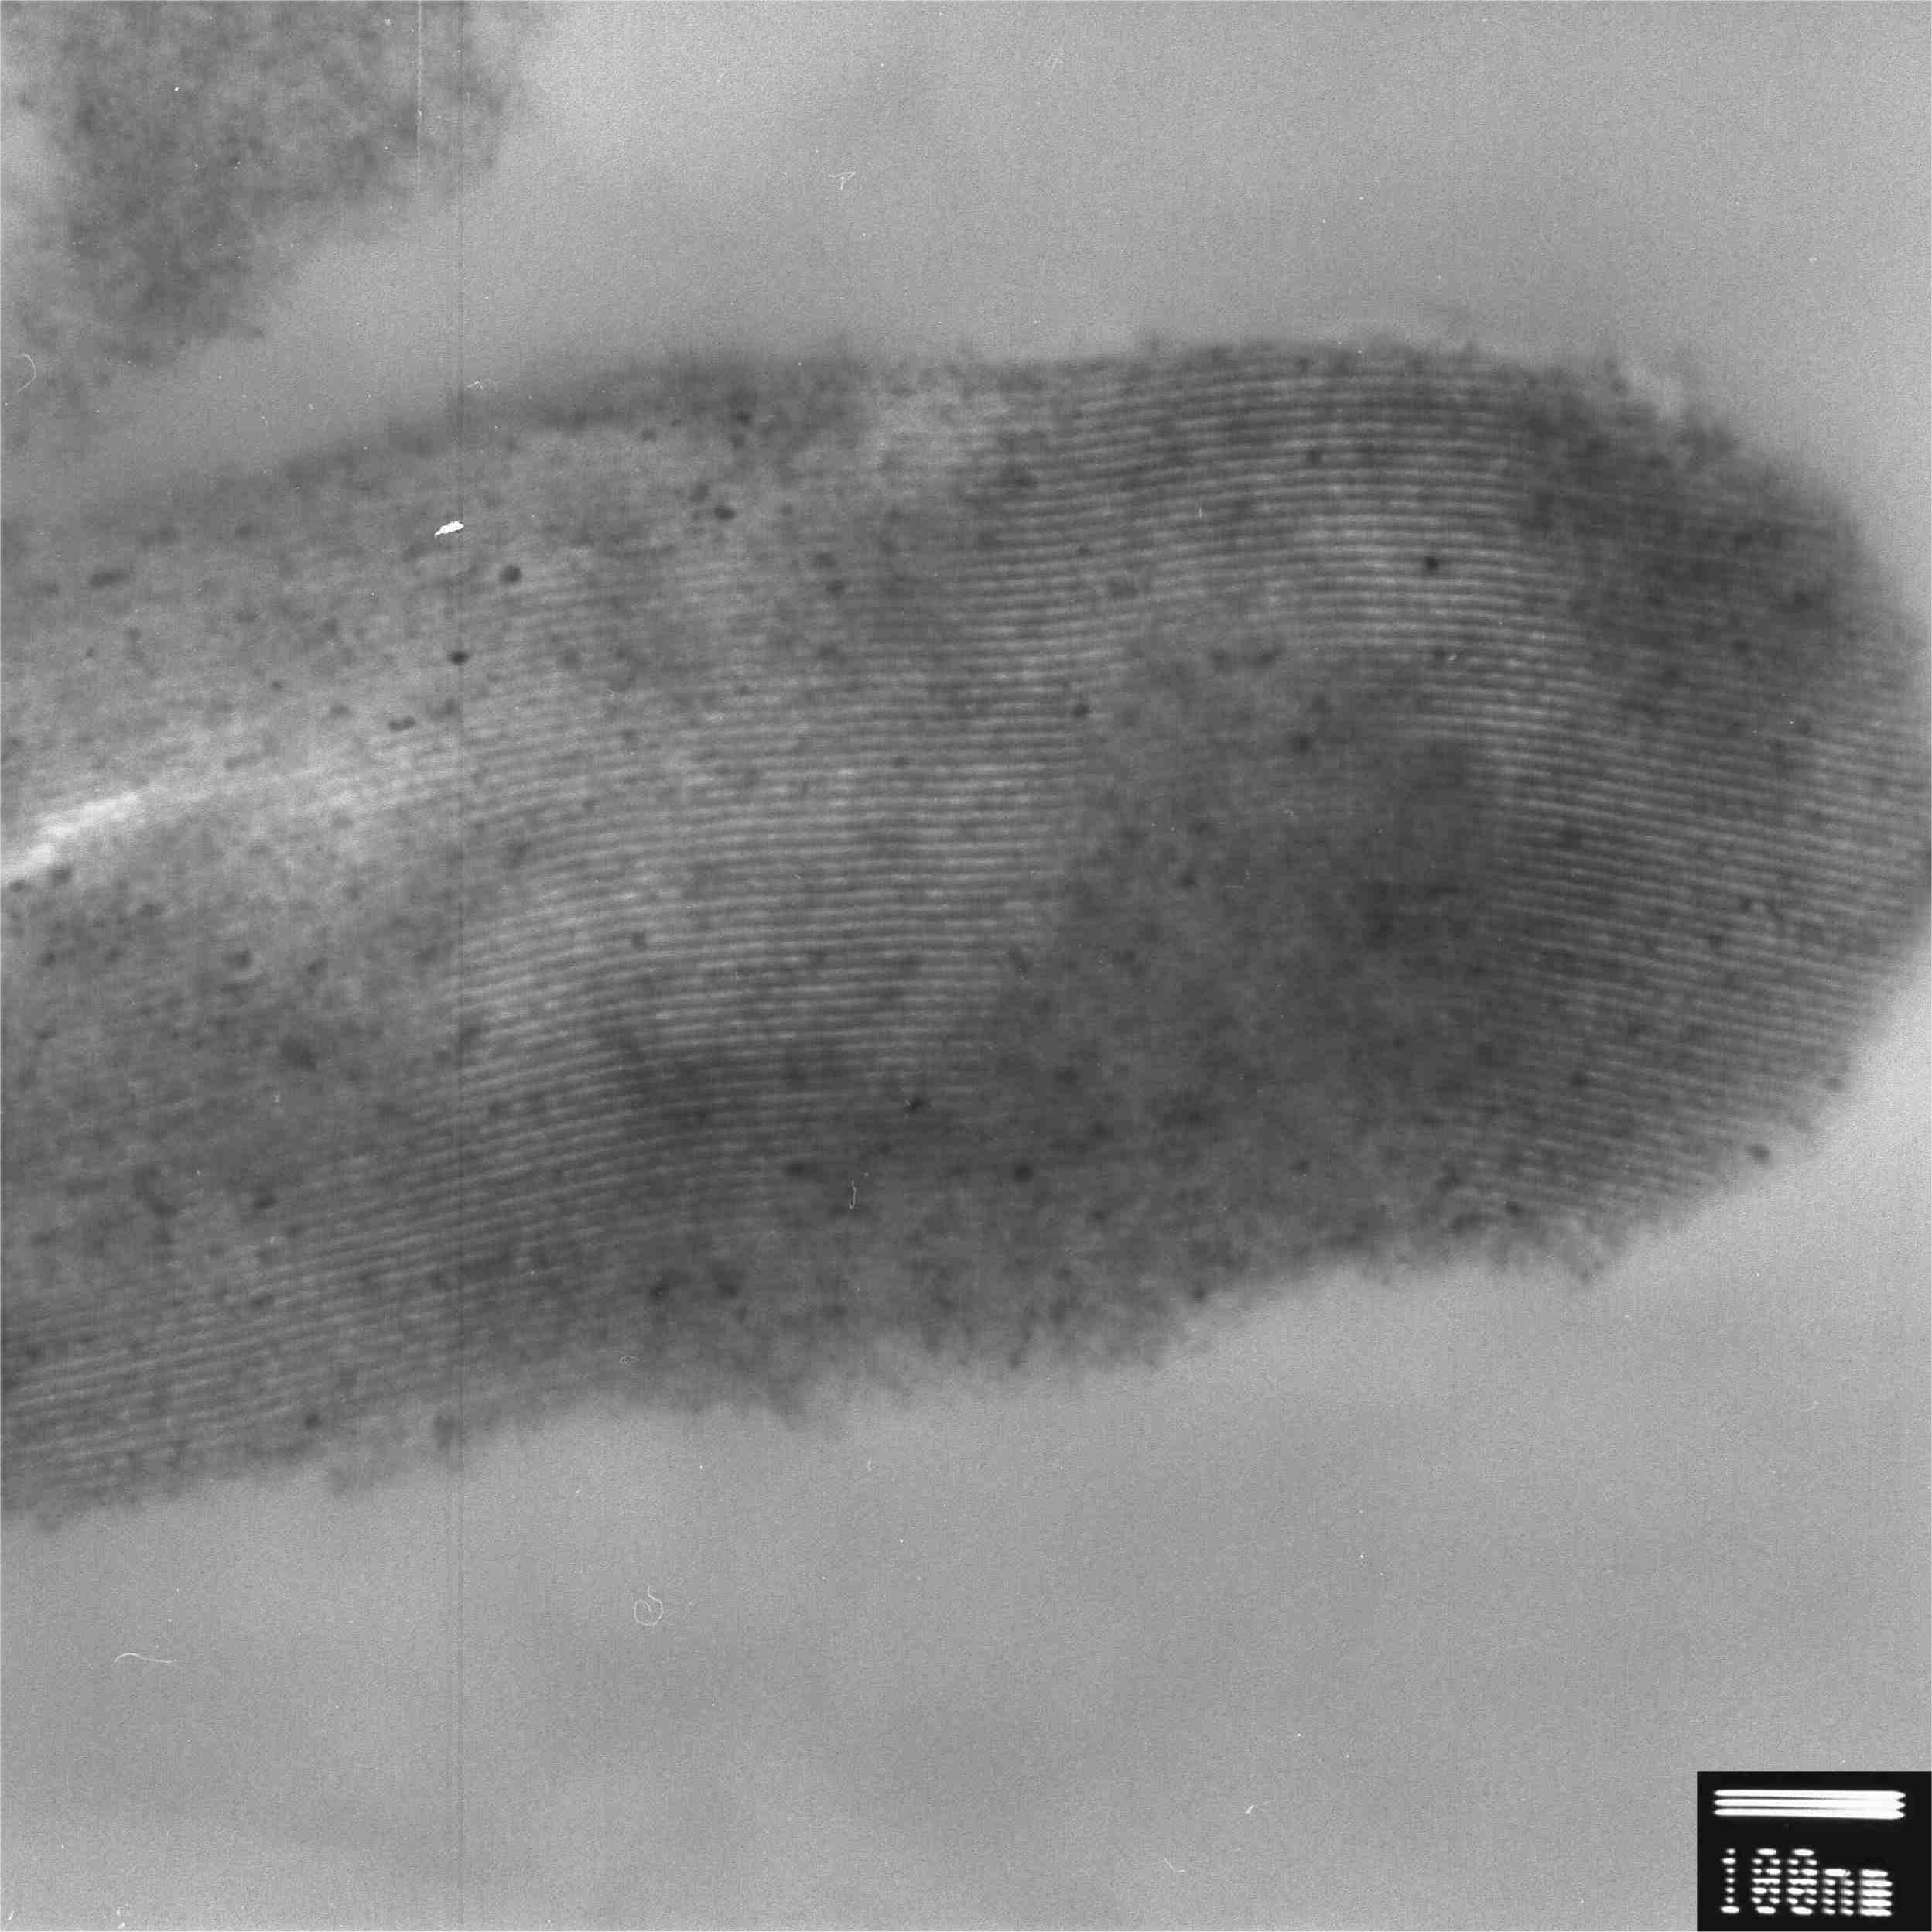


**Figure 13S.** TEM micrograph of sample **3a** showing exclusive formation of Mn3O4 nanoparticles within the pore channels.

**Figure 14S.** Powder X-ray diffraction pattern within the range of 2** (10 – 70°) for the cluster [Mn12O12(CH3COO)16(H2O)4] inserted into the nonfunctionalized silica and calcinated at 700 °C showing the formation of manganese oxides Mn2O3 and Mn3O4.


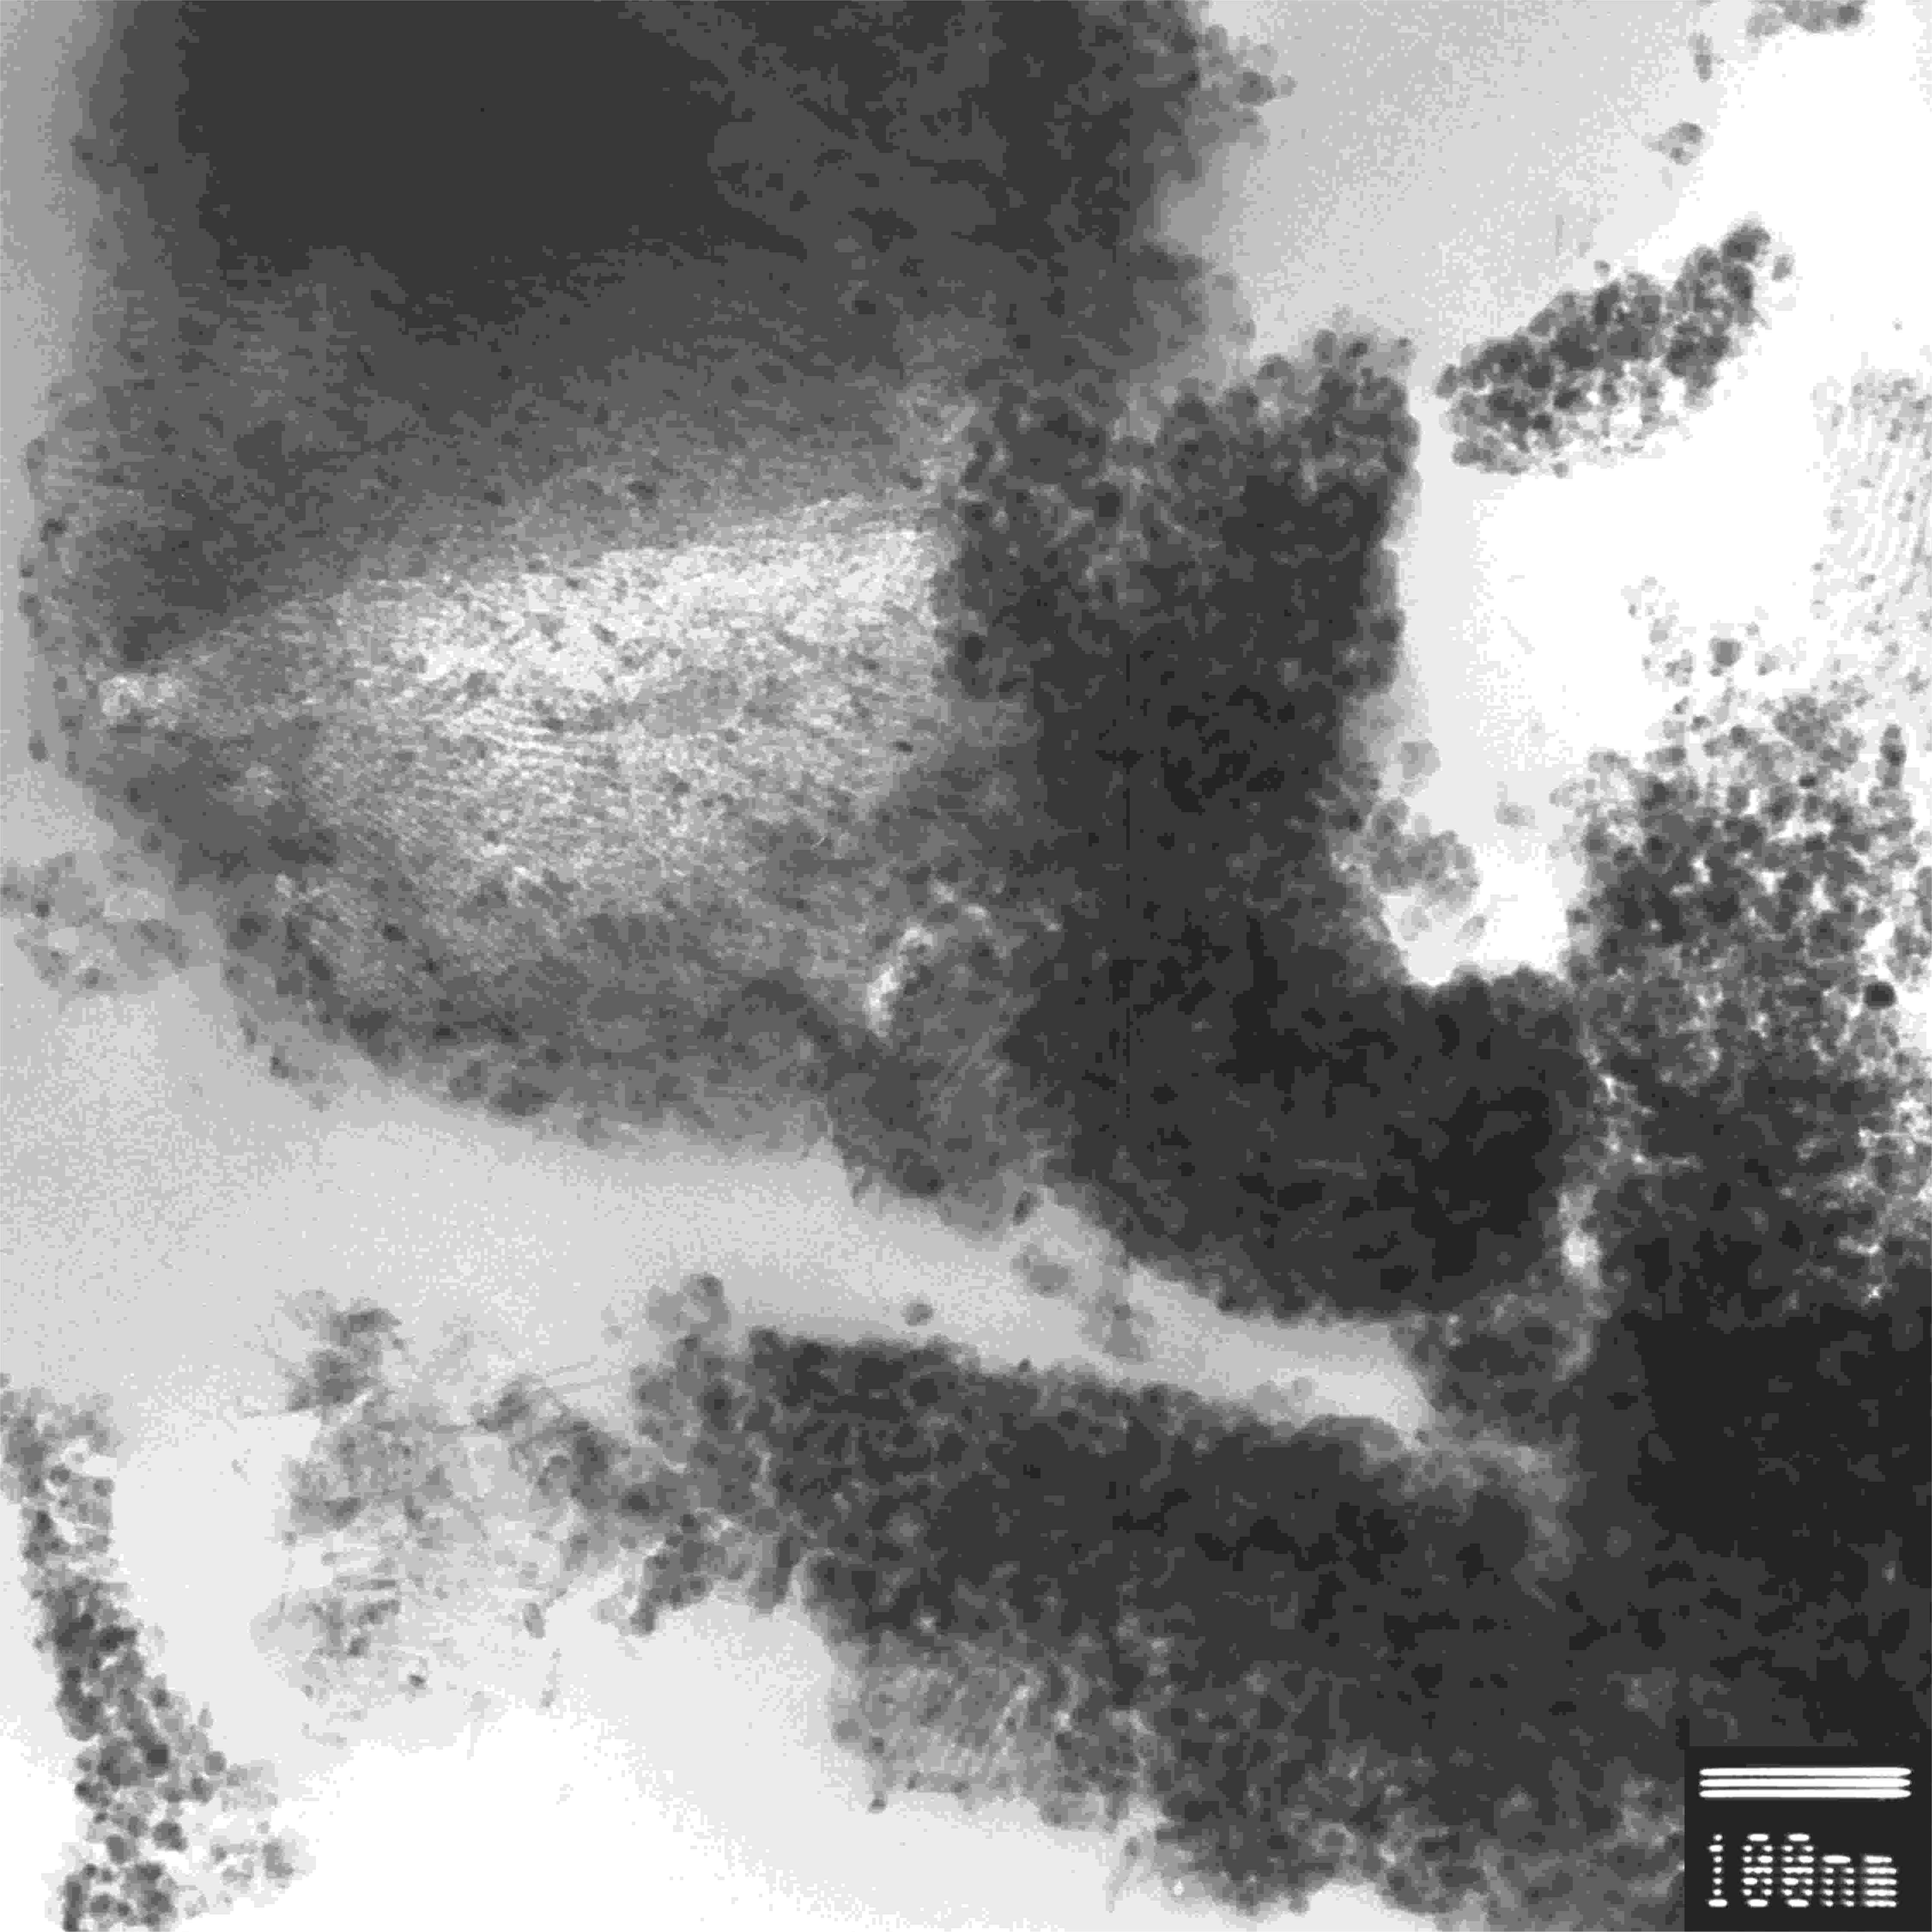


Mesoporous silica

Manganse

oxides

**Figure 15S.** TEM micrograph of the sample obtained by thermal treatment (at 700 °C) of the cluster [Mn12O12(CH3COO)16(H2O)4] inserted into the nonfunctionalized silica showing the extrusion of the manganese oxide out of the silica pores.
